# Supplementary material for: Ecological Analyses of Mycobacteria in Showerhead Biofilms and Their Relevance to Human Health
Source: PubMed Central journal article supplement (PMC6212831; doi:10.1128/mbio.01614-18), 2018-10-30

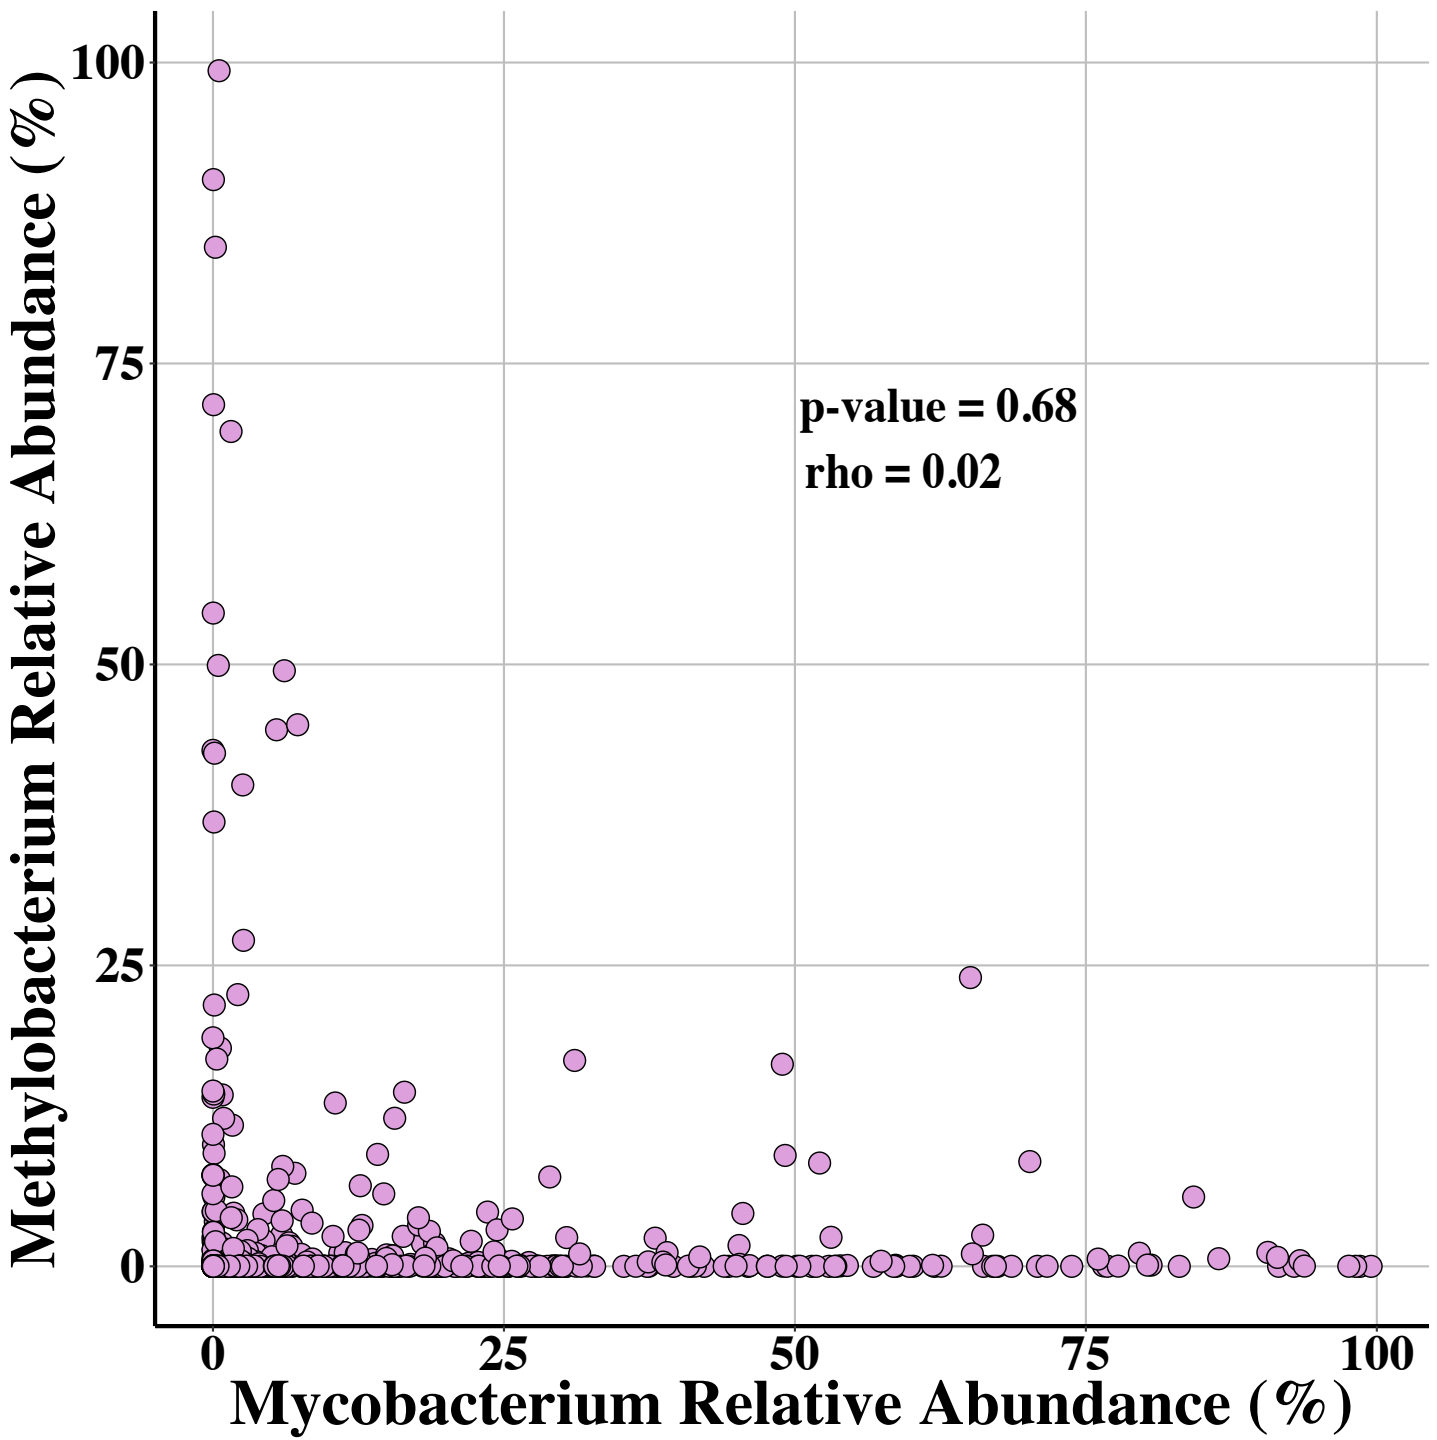

Supplement: mbo005184117sf4.pdf [file mbo005184117sf4.pdf]
