# Supplementary material for: Ecological Analyses of Mycobacteria in Showerhead Biofilms and Their Relevance to Human Health
Source: PubMed Central journal article supplement (PMC6212831; doi:10.1128/mbio.01614-18), 2018-10-30

- █ Culture Dependent and Independent
- █ Culture Independent Only
- █ Culture Dependent Only
- Other

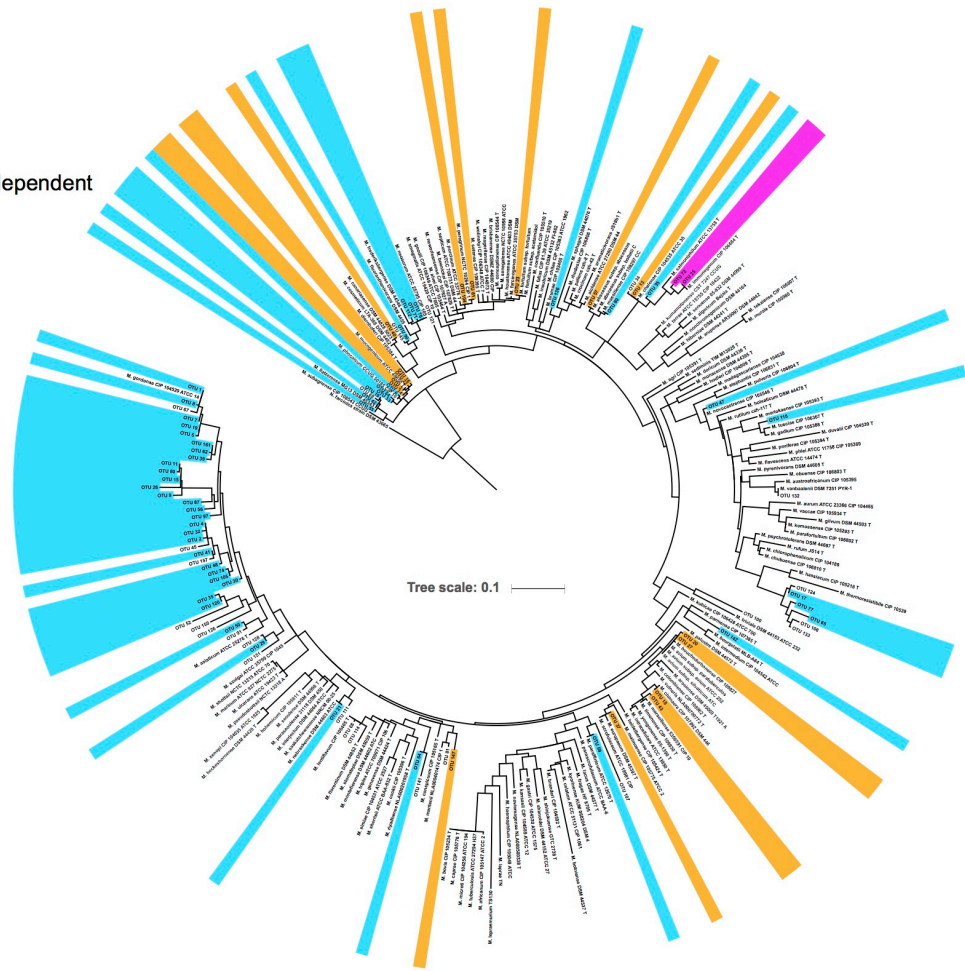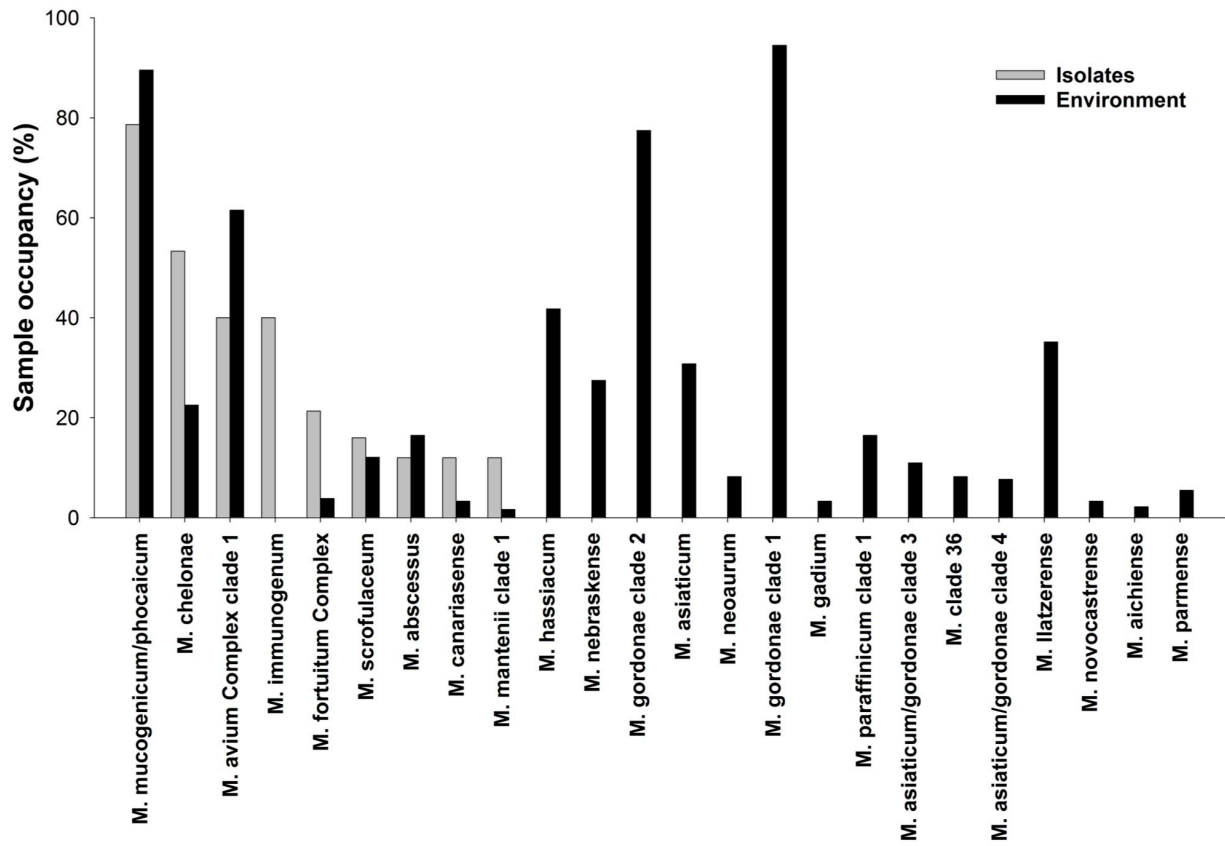

Supplement: mbo005184117sf7.pdf [file mbo005184117sf7.pdf]
