# Supplementary material for: Ecological Analyses of Mycobacteria in Showerhead Biofilms and Their Relevance to Human Health
Source: PubMed Central journal article supplement (PMC6212831; doi:10.1128/mbio.01614-18), 2018-10-30
Supplement: mbo005184117sf8.pdf [file mbo005184117sf8.pdf]

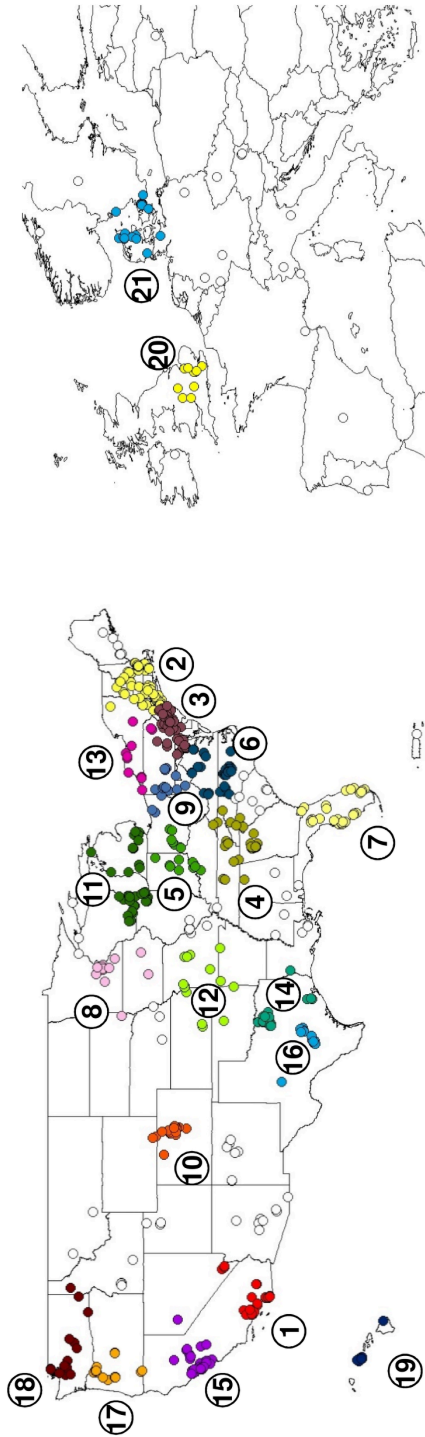

**M. gordonae clade 1**  
Pseudo-F = 3.65; P < 0.01

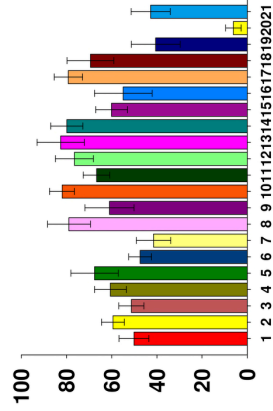

**M. mucogenicum/phocaicum**  
Pseudo-F = 5.31; P < 0.01

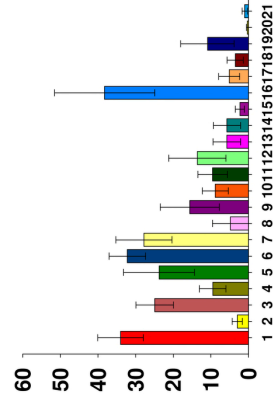

**M. gordonae clade 2**  
Pseudo-F = 2.05; P = 0.01

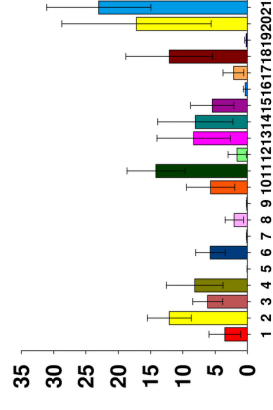

**M. llutzerense**  
Pseudo-F = 5.84; P < 0.01

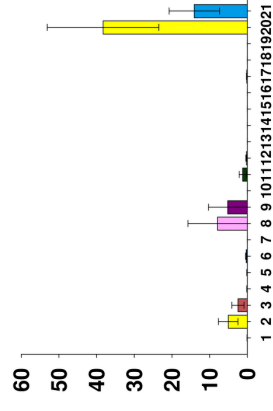

**M. avium Complex**  
Pseudo-F = 3.31; P < 0.01

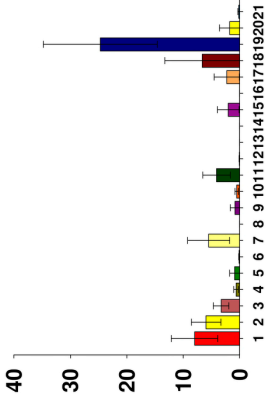

**M. fortuitum Complex**  
Pseudo-F = 2.79; P < 0.01

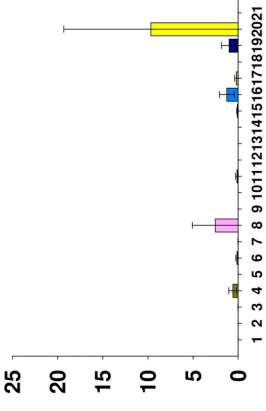

**M. asiaticum/gordonae clade 3**  
Pseudo-F = 2.25; P = 0.02

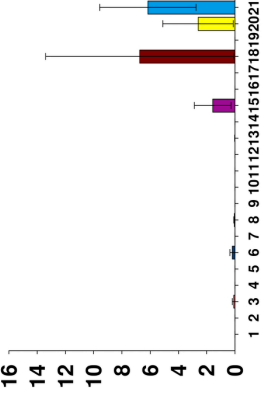

**M. abscessus Complex**  
Pseudo-F = 2.21; P = 0.02

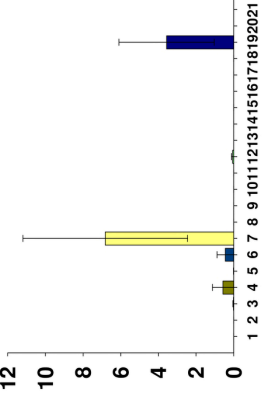

Region
